# Supplementary material for: Evaluation of the Abdala Vaccine: Antibody and Cellular Response to the RBD Domain of SARS-CoV-2
Source: MDPI journal article supplement (doi:10.3390/vaccines11121787), 2023-11-30
Supplement: s1 [file s1]

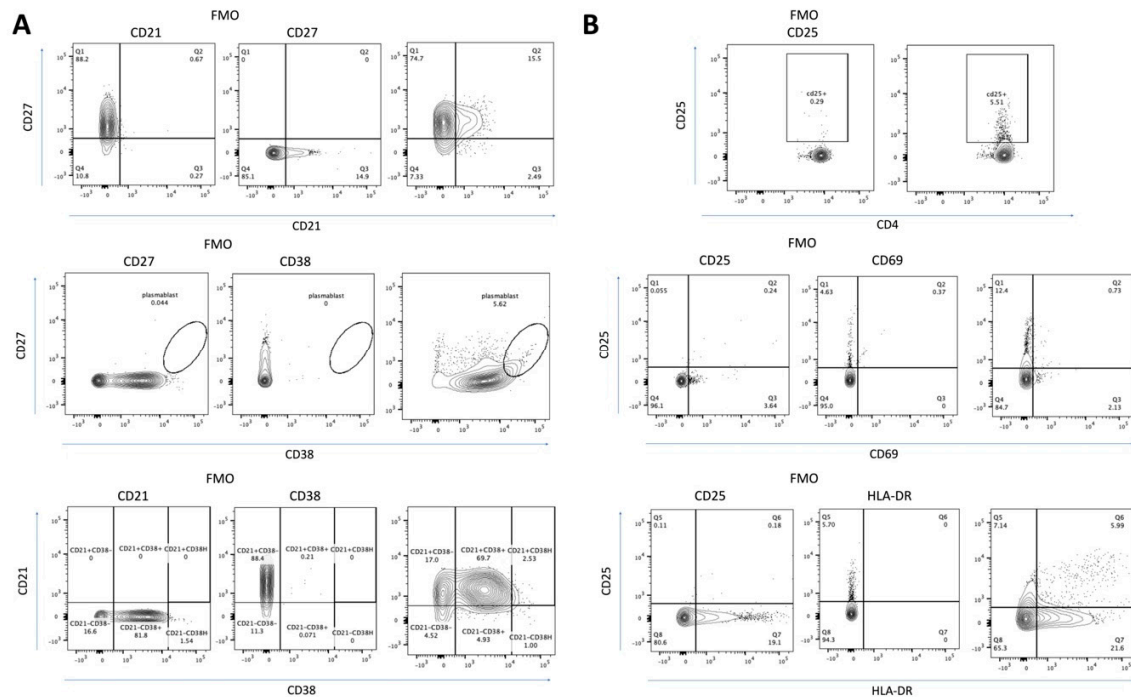

**Figure S1: FMO controls.** **A.** FMO panel for B-lymphocytes analysis, CD21 vs CD27, CD38 vs CD27, and CD38 vs CD21 dot plot from CD19+ lymphocytes. FMO for CD21, CD27 and CD38 are shown. **B.** FMO panel for T-lymphocytes analysis, CD4 vs CD25, CD69 vs CD25, and HLA-DR vs CD25 dot plot from CD3+CD4+ lymphocytes. FMO for CD25, CD69 and HLA-DR are shown.

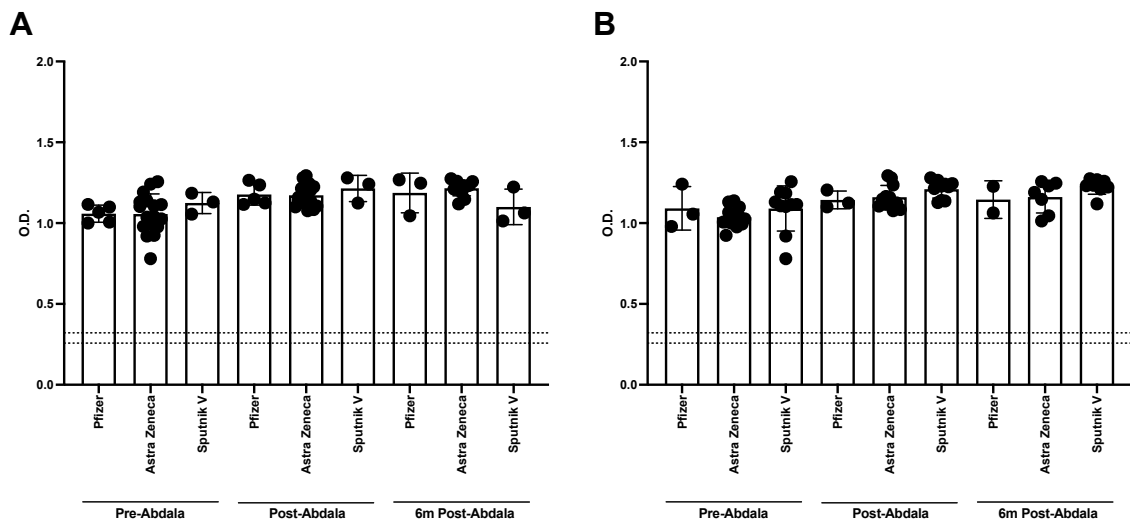

**Figure S2: OD of IgGs related to SARS-CoV-2 against RDB domain of S protein.** **(A)** OD of IgG against RBD pre- and post-Abdala vaccination and 6 months (6m) post-Abdala vaccination by initial vaccine scheme. Pre-Abdala vaccination: Pfizer n = 5, Astra Zeneca n = 17, Sputnik V n = 3; post-Abdala vaccination: Pfizer n = 5, Astra Zeneca n = 17, Sputnik V n = 3; and 6 months (6m) post-Abdala vaccination: Pfizer n = 3, Astra Zeneca n = 11, Sputnik V n = 3. **(B)** OD of IgG against RBD pre- and post-Abdala vaccination and 6 months (6m) post-Abdala vaccination by initial booster dose. Pre-Abdala vaccination: Pfizer n = 3, Astra Zeneca n = 12, Sputnik V

n = 10; post-Abdala vaccination: Pfizer n = 3, Astra Zeneca n = 12, Sputnik V n = 10; and 6 months (6m) post-Abdala vaccination: Pfizer n = 2, Astra Zeneca n = 7, Sputnik V n = 8. Mean and standard deviation (SD) are shown. Central trend values and dispersion values are indicated in Table S1 in Supplementary Data.

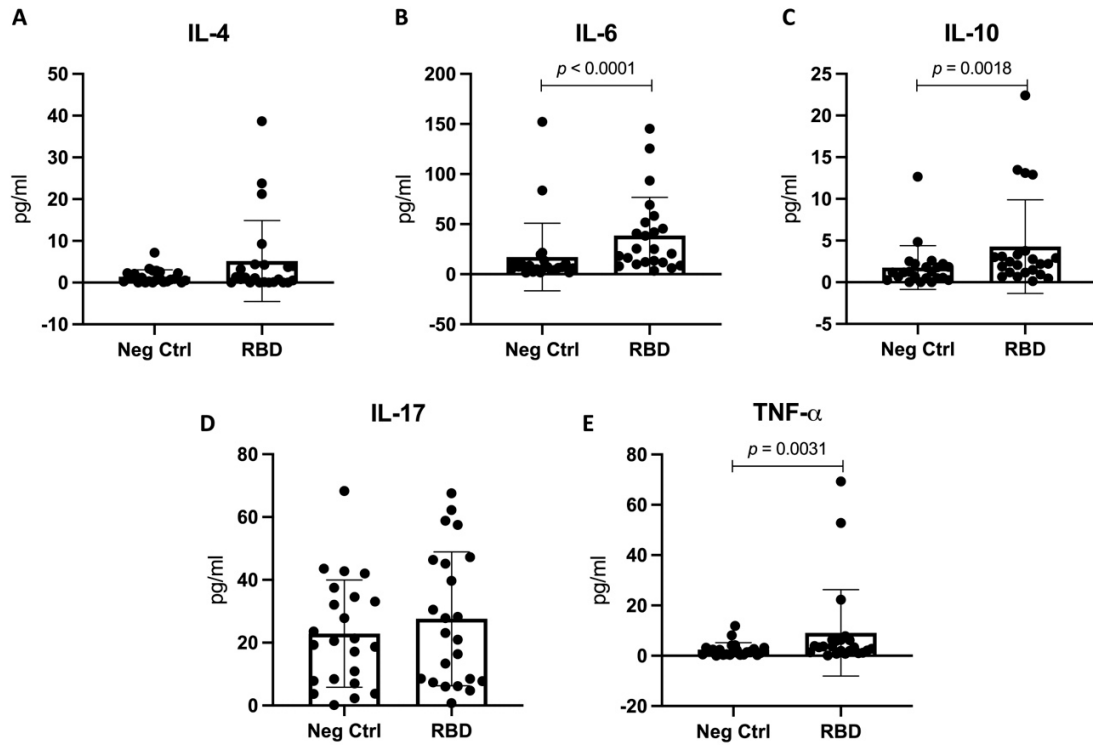

**Figure S3. Concentration of cytokines after stimulus with RBD protein for 24h.** A. pg/mL of IL-4. B. pg/mL of IL-6. C. pg/mL of IL-10. D. pg/mL of IL-17. E. pg/mL of TNF- $\alpha$  n = 23. Mean and standard deviation of mean (SD) are shown. Central trend values and dispersion values are indicated in Table S5, Supplementary Data.
